# Supplementary material for: Formation and relaxation kinetics of starch–particle complexes
Source: Royal Society of Chemistry journal article supplement (doi:10.1039/c6sm01312k), 2016-01-01
Supplement: c6sm01312k1.pdf [file c6sm01312k1.pdf]

### Supporting information

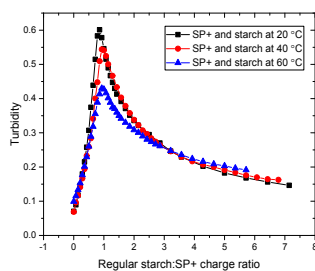

**Fig. S1** Turbidity curves for SP+ 0.1 wt% titrated with the regular starch when the sample is held at different temperatures.

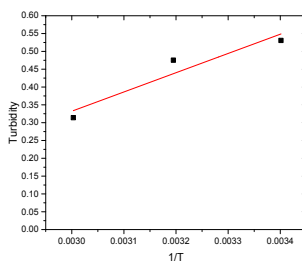

**Fig. S2** Plot of turbidity vs  $1/T$  for SP+ and added regular starch corresponding to maximum in turbidity.

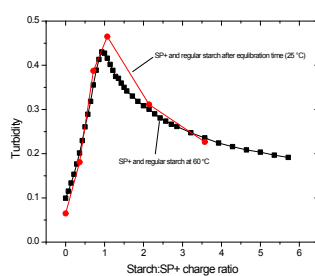

**Fig. S3** Comparison of the titration curve at 60 °C and the equilibrated values for the titration curve at room temperature. The faster reorganization at higher temperature results in a similar titration curve as for the equilibrated curve at room temperature.

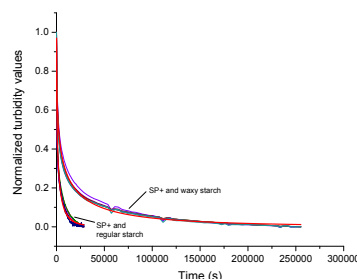

**Fig. S4** Normalized turbidity curves for all starch to SP+ charge ratios for both regular and waxy starch.

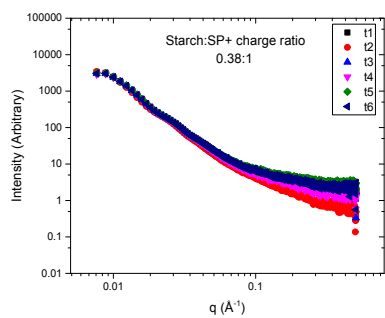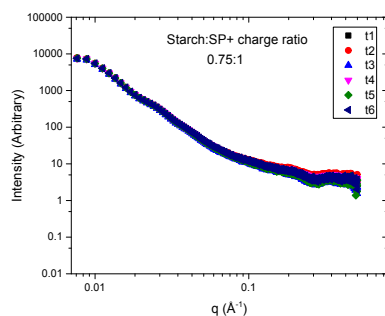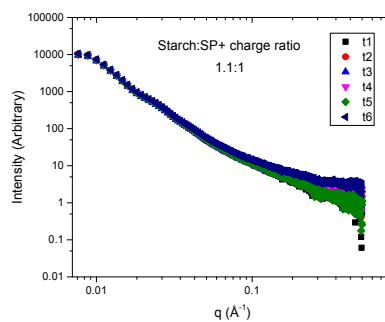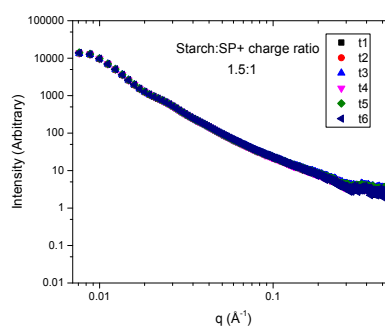

**Fig. S5** SAXS data, log-log diagrams of  $I(q)$  vs  $q$  for different starch (regular) to SP+ charge ratios at different time points, t1-t6, corresponding to measurements every ten minutes for one hour.

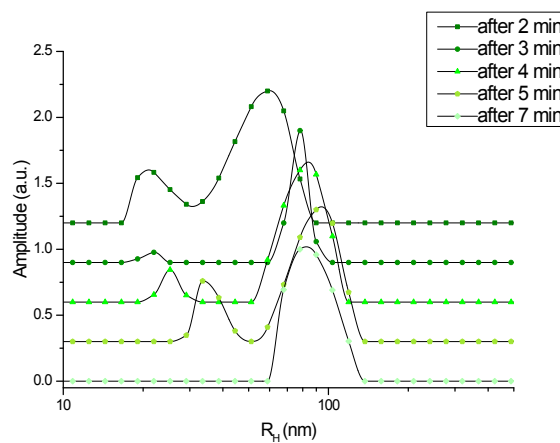

**Fig. S6** Amplitude of the light scattering signal as a function of  $R_H$  for 0.001 wt% SP+ particles in the presence of waxy starch at a 1:1 charge ratio for the first 7 minutes after mixing.
